# Supplementary material for: Intrinsic Features in MicroRNA Transcriptomes Link Porcine Visceral Rather than Subcutaneous Adipose Tissues to Metabolic Risk
Source: PLoS One. 2013 Nov 6;8(11):e80041. doi: 10.1371/journal.pone.0080041 (PMC3819305; doi:10.1371/journal.pone.0080041)
Supplement: Table S1 — Primer sequences used in q-PCR validation. (XLS) [file pone.0080041.s003.xls]

## Sheet: Sheet1
Supplemental Table S1. Primer sequences used in q-PCR validation.
miRNA name	Forward primer	Reverse primer
ssc-miR-148a-3p	TCAGTGCACTACAGAACTTTGT	Universal primer supplied by kit
ssc-miR-143-3p	TGAGATGAAGCACTGTAGCTCG
ssc-miR-27b-3p	TTCACAGTGGCTAAGTTCTGC
ssc-let-7a-1-5p	TGAGGTAGTAGGTTGTATAGTT
ssc-let-7f-5p	TGAGGTAGTAGATTGTATAGTT
ssc-miR-101-1/2-3p	TACAGTACTGTGATAACTGAAG
ssc-miR-21-5p	TAGCTTATCAGACTGATGTTGA
ssc-miR-24-1/2-3p	TGGCTCAGTTCAGCAGGAACAG
ssc-miR-126-3p	TCGTACCGTGAGTAATAATGCG
ssc-miR-199a-2-5p	CCCAGTGTTCAGACTACCTGTTC
ssc-miR-451-5p	AAACCGTTACCATTACTGAGTT
ssc-miR-10b-5p	GTAGAACCGAATTTGT
ssc-miR-10a-5p	TACCCTGTAGATCCGAATT
ssc-miR-378-1/2-3p	CACTGGACTTGGAGTCAGAAGGC
ssc-miR-145-5p	GTCCAGTTTTCCCAGGAATCCCT
ssc-let-7i-5p	TGAGGTAGTAGTTTGTGCTGTT
ssc-miR-125b-1-5p	TCCCTGAGACCCTAACTTGTGA
ssc-miR-125a-5p	TCCCTGAGACCCTTTAACCTGT
U6 snRNA	TTATGGGTCCTAGCCTGAC	CACTATTGCGGGTCTGC
5S rRNA	GCCCGATCTCGTCTGATCT	AGCCTACAGCACCCGGTATT
Met-tRNA	CAGAGTGGCGCAGCGGAAGC	CGATCCATCGACCTCTGGGTTATG
